# Supplementary material for: Positive and negative social support and depressive symptoms according to economic status among adults in Korea: cross-sectional results from the Health Examinees-Gem Study
Source: PubMed Central journal article supplement — BMJ Open. 2019 Apr 20;9(4):e023036. doi: 10.1136/bmjopen-2018-023036 (PMC6500322; doi:10.1136/bmjopen-2018-023036), 2019-04-20
Supplement: bmjopen-2018-023036supp001.pdf [file bmjopen-2018-023036supp001.pdf]

Supplemental Table 1. 20-items of the Centers for Epidemiologic Studies-Depression Scale (CES-D)

1. I was bothered by things that usually don't bother me.
2. I did not feel like eating; my appetite was poor
3. I felt that I could not shake off the blues even with help from my family or friends.
4. I had trouble keeping my mind on what I was doing.
5. I was happy.
6. I felt depressed.
7. I felt that everything I did was an effort.
8. I felt hopeful about the future.
9. I thought my life had been a failure.
10. I felt I was just as good as other people
11. My sleep was restless. I had a lot of trouble getting to sleep.
12. I felt fearful.
13. I talked less than usual.
14. I felt lonely.
15. I enjoyed life.
16. People were unfriendly.
17. I had crying spells.
18. I felt sad.
19. I felt that people disliked me.
20. I could not get going.

Supplemental Table 2. Questions for measuring positive and negative social support

Ask to the following questions on feeling about the people around you.

<Positive social support>

1. There is a person whom I can confide in
2. There is a person who always care or worry about me
3. There is a person whom I can discuss with when I have important or difficult matters
4. There is a person who nurses me and give a help in housework when I am ill
5. There is a person who gives or lends it when I need something
6. There is a person who takes a time for me and help with housework whenever I request

<Negative social support>

1. There is a person who object to or meddle with what I do
2. There is a person who blames me for all the problems I have
3. There is a person who forgets or ignores me
4. There is a person who gives you unwanted help and make me uncomfortable
5. There is a person who is indifferent to me and my affair
6. There is a person who turns down most of the time when I ask help

Supplemental table 3. Chi-square correlation test between positive and negative social support

|                  |         | Positive support |       |                |       |                |       |
|------------------|---------|------------------|-------|----------------|-------|----------------|-------|
|                  |         | Level 1          |       | Level 2        |       | Level 3        |       |
|                  |         | $\chi^2$ (P)     | Phi   | $\chi^2$ (P)   | Phi   | $\chi^2$ (P)   | Phi   |
| Negative support | Level 1 | 299.1(p<0.001)   | -0.12 | 92.3(p<0.001)  | 0.07  | 273.7(p<0.001) | 0.11  |
|                  | Level 2 | 443.2(p<0.001)   | -0.15 | 236.1(p<0.001) | 0.11  | 202.5(p<0.001) | 0.10  |
|                  | Level 3 | 783.0(p<0.001)   | 0.19  | 347.5(p<0.001) | -0.13 | 474.5(p<0.001) | -0.15 |

Supplemental table 4. Association of other covariates and depressive symptom score (from Model 6 in Table 2)

|                                      | <b>Coeff.</b> | <b>S.E.</b> |
|--------------------------------------|---------------|-------------|
| <b>Currently married/co-residing</b> |               |             |
| Never married                        | 0.46          | 0.29        |
| Separated/divorced                   | 2.09***       | 0.25        |
| Widowed                              | 1.11***       | 0.22        |
| Others                               | -0.90         | 1.16        |
| <b>40≤age&lt;50(yrs)</b>             |               |             |
| 50≤age<60                            | -0.20*        | 0.10        |
| 60≤age<70                            | -0.84***      | 0.14        |
| <b>Male</b>                          |               |             |
| Female                               | 0.74***       | 0.11        |
| <b>Non-manual</b>                    |               |             |
| Service and sales workers            | 0.24          | 0.15        |
| Manual                               | -0.18         | 0.16        |
| Armed forces occupation              | -1.98         | 1.28        |
| Housewives                           | 0.63***       | 0.15        |
| Unemployed                           | 0.32          | 0.20        |
| Others                               | -0.50         | 0.64        |
| <b>Primary school or below</b>       |               |             |
| High school graduate                 | -0.56***      | 0.13        |
| College degree                       | -0.80***      | 0.18        |
| Graduate school or higher            | -1.17***      | 0.27        |

\*:p<0.05, \*\*: p<0.01, \*\*\* :p<0.001
